# Supplementary material
Source: HighWire-hosted journal article supplement (https://jnm.snmjournals.org/highwire/filestream/94333/field_highwire_adjunct_files/0/108654_Supplemental_Data.pdf)

## Supplemental figure legends

### Figure 1

Functional form of the continuous PFS predictor MILAS based on the multivariable fractional polynomial regression analysis. A 95% confidence interval band coats the fitted line.

### Figure 2

Functional form of the continuous OS predictor MILAS based on the multivariable fractional polynomial regression analysis. A 95% confidence interval band coats the fitted line.

### Figure 3

Functional form of the continuous PFS predictor  $SUV_{max}$  based on the multivariable fractional polynomial regression analysis. A 95% confidence interval band coats the fitted line.

### Figure 4

Functional form of the continuous OS predictor  $SUV_{max}$  based on the multivariable fractional polynomial regression analysis. A 95% confidence interval band coats the fitted line.

**Abbreviations:** MILAS, metabolic imaging lymphoma aggressiveness scale; OS, overall survival; PFS, progression free survival;  $SUV_{max}$ , FDG maximal standardized uptake value

# Relationship MILAS and PFS

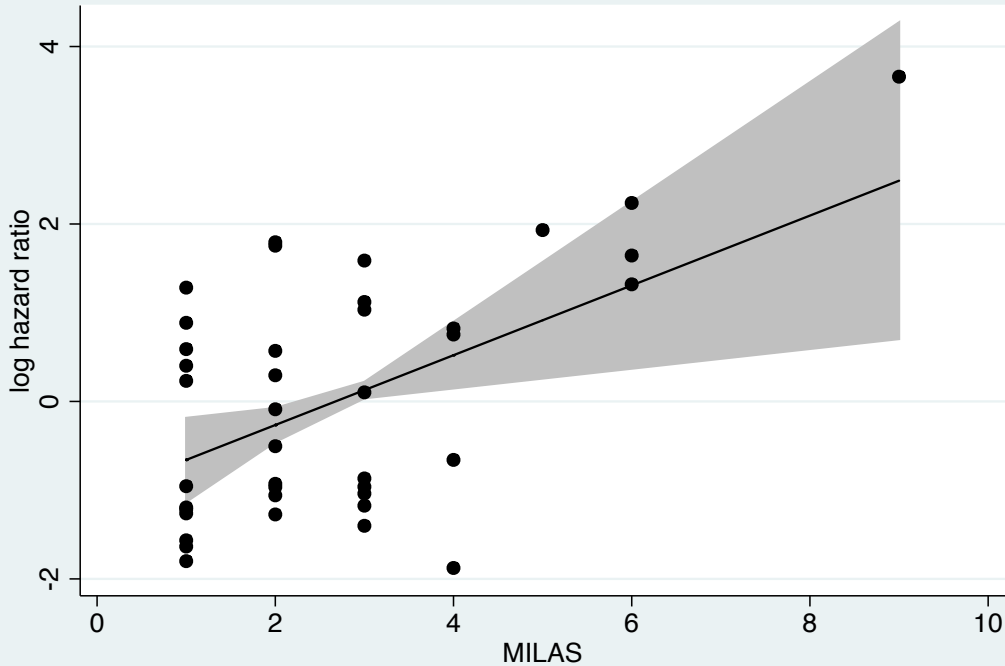

# Relationship MILAS and OS

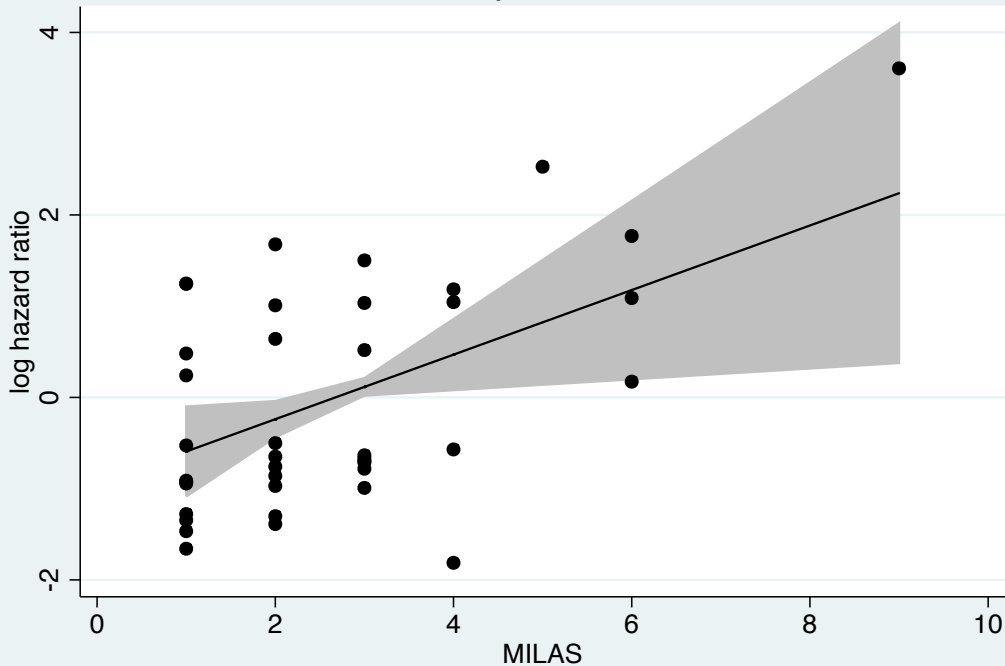

# Relationship SUVmax and PFS

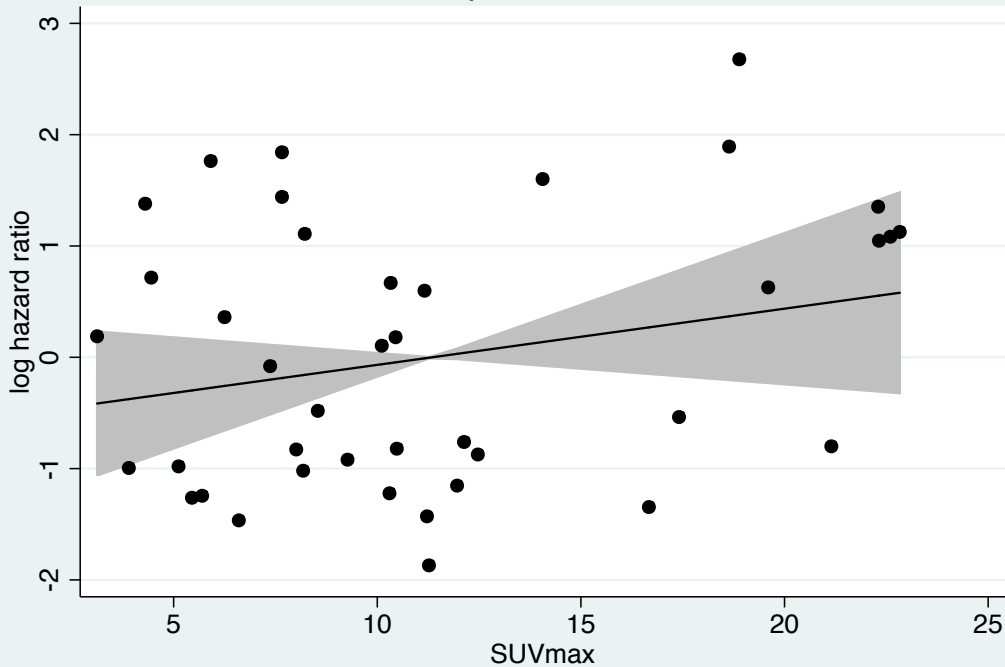

# Relationship SUVmax and OS

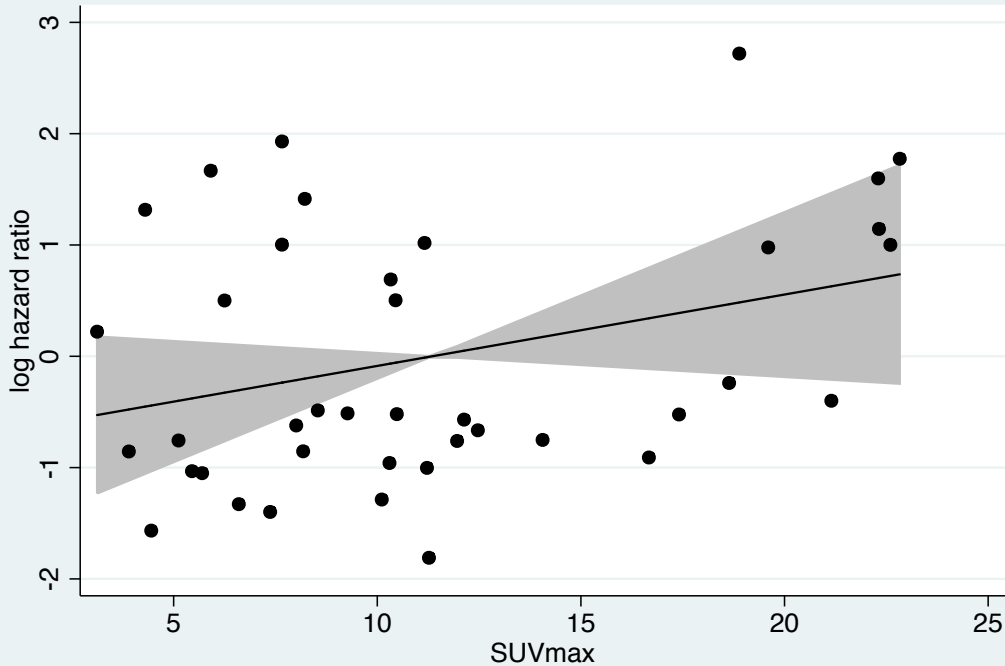

Supplement: 108654_Supplemental_Data.pdf [file 108654_Supplemental_Data.pdf]
